# Supplementary material for: Mitochondrial Ribosomal Protein L10 Associates with Cyclin B1/Cdk1 Activity and Mitochondrial Function
Source: PubMed Central journal article supplement — DNA Cell Biol. 2016 Nov 1;35(11):680–90. doi: 10.1089/dna.2016.3271 (PMC5105351; doi:10.1089/dna.2016.3271), 2016-11-01
Supplement: Supp_Fig1.pdf [file Supp_Fig1.pdf]

## Supplementary Data

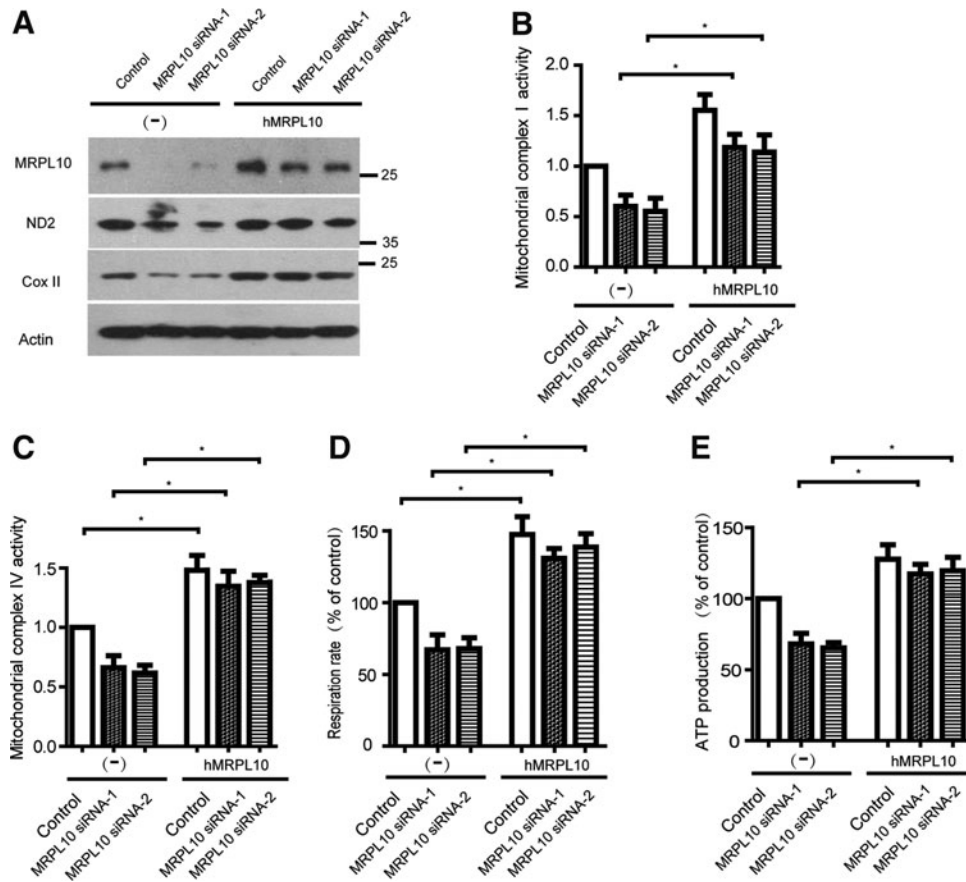

**SUPPLEMENTARY FIG. S1.** Exogenous MRPL10 expression restores mitochondrial abnormality caused by MRPL10 knockdown. **(A)** HEK293 cells were knockdown with MRPL10 first, and transfected with pcDNA3.1 empty vector or human MRPL10 expression plasmid, protein from total cell lysates were subjected to SDS-PAGE and immunoblotted with the antibodies indicated. Bar graphs depict the signal intensities of protein indicated. **(B, C)** Activities of the mitochondrial respiratory complex I, IV were measured in isolated mitochondria. **(D)** Mitochondrial respiration rate was measured using a clark type electrode in each group. **(E)** ATP production was measured in each group. \* $p < 0.05$ . SDS-PAGE, sodium dodecyl sulfate-polyacrylamide gel electrophoresis.
